# Supplementary material
Source: PubMed Central journal article supplement (PMC7364332)
Supplement: Supp_Fig1.pdf [file Supp_Fig1.pdf]

## Supplementary Data

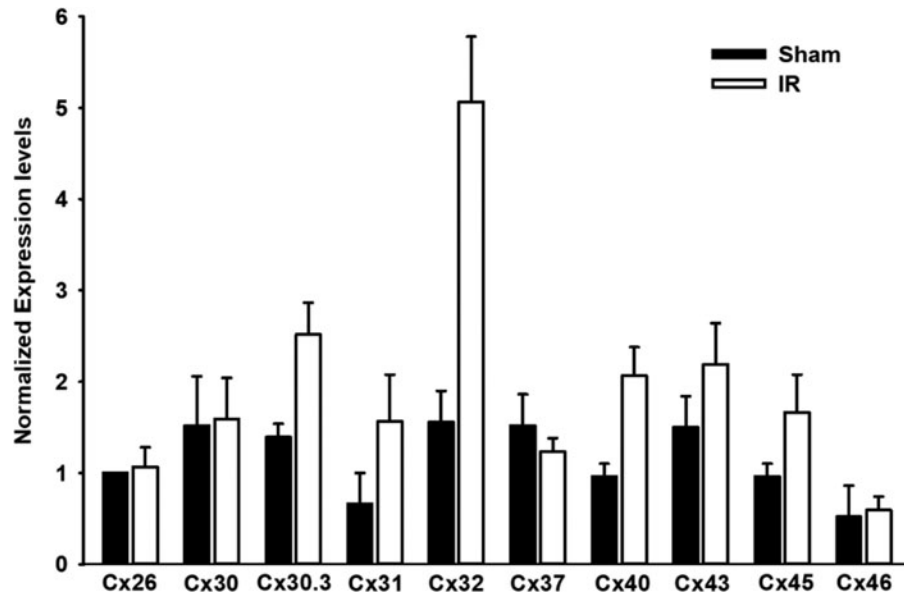

**SUPPLEMENTARY FIG. S1 Connexins expression in kidney tissues.** Real-time polymerase chain reaction analysis to detect the expression levels of all of the connexins in kidney tissue. The transcript levels were normalized to the levels of Cx26 sham group. Data are presented as mean  $\pm$  SE ( $n=8$ ). Cx, connexin; IR, ischemia reperfusion.
