# Supplementary material
Source: PubMed Central journal article supplement (PMC7364332)
Supplement: Supp_Fig3.pdf [file Supp_Fig3.pdf]

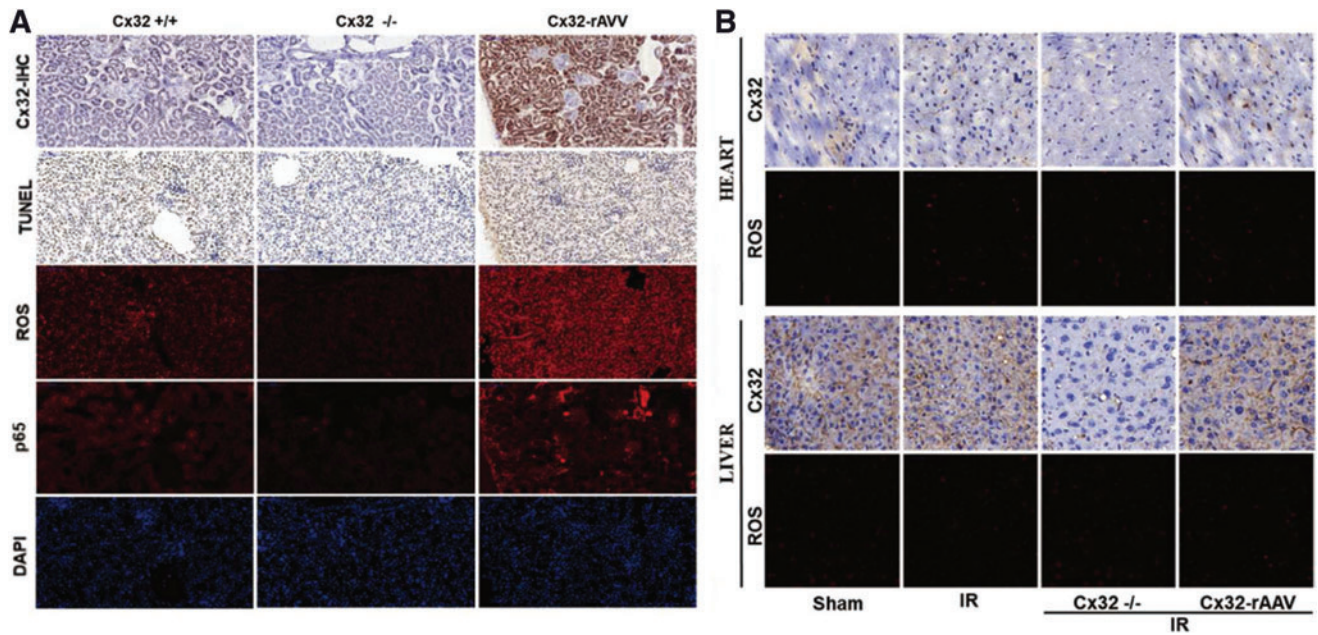

**SUPPLEMENTARY FIG. S3. Cx32 regulates ROS/NF- $\kappa$ B-mediated mitochondrial apoptosis in kidneys after renal IR but not in hearts or livers.** The kidney-specific Cx32 overexpression mice (Cx32-rAAV) were constructed by tail vein injection of recombinant adeno-associated virus (rAAV) vectors containing the genes for Cx32. At 8 weeks of life, Cx32<sup>-/-</sup>, Cx32<sup>+/+</sup>, and Cx32-rAAV mice underwent renal IR were sacrificed at the time point of 24 h after reperfusion. **(A)** Similar expression area of ROS accumulation, Cx32 expression, NF- $\kappa$ B activation, and apoptosis in kidneys of Cx32<sup>-/-</sup>, Cx32<sup>+/+</sup>, and Cx32-rAAV mice after renal IR (scale bar 50  $\mu$ m). **(B)** Expression of Cx32 was detected by IHC, and ROS were stained with DHE (*red*) in heart and liver after renal IR (scale bar 50  $\mu$ m). DHE, dihydroethidium; ROS, reactive oxygen species.
