# Supplementary material
Source: PubMed Central journal article supplement (PMC7364332)
Supplement: Supp_Fig4.pdf [file Supp_Fig4.pdf]

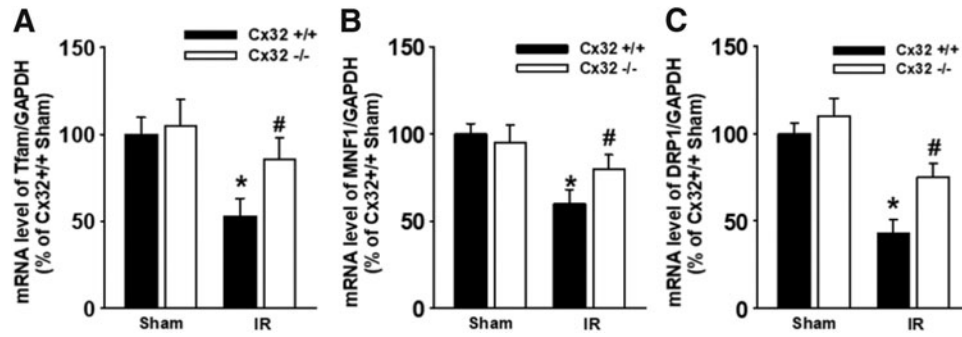

**SUPPLEMENTARY FIG. S4. Cx32 deficiency protects against IR-induced mitochondrial injuries.** Mitochondrial functions were detected by measuring the mRNA level of mitochondrial transcription factor A (Tfam) (A), mitochondrial nucleoid factor 1 (B) and Dynamin-related protein 1 (C). Data are presented as mean  $\pm$  SE ( $n=8$ ). \* $p < 0.05$  versus Cx32<sup>+/+</sup> sham group; # $p < 0.05$  versus Cx32<sup>+/+</sup> IR group.
