# Supplementary material
Source: PubMed Central journal article supplement (PMC7364332)
Supplement: Supp_Fig6.pdf [file Supp_Fig6.pdf]

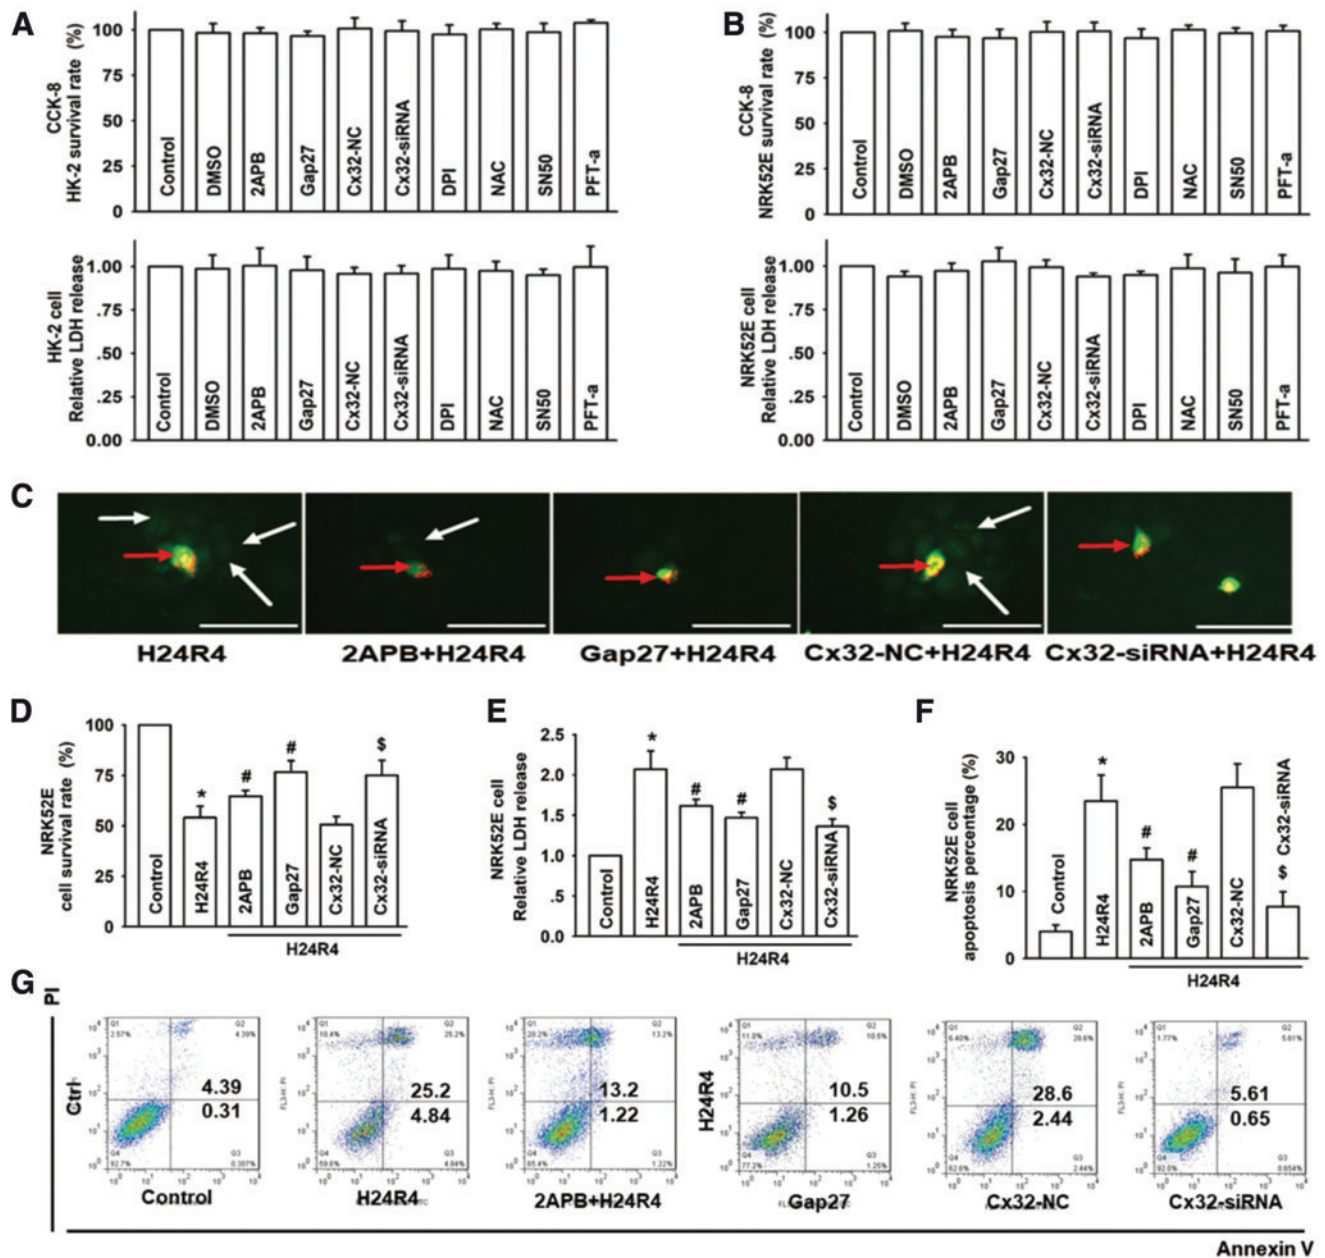

**SUPPLEMENTARY FIG. S6. Cx32 inhibition attenuates H24R4-induced cell mitochondrial injuries and apoptosis of NRK52E cells.** Before H24R4 exposure, cells were incubated with 2APB (gap junction inhibitor, 25  $\mu$ M) or DPI (an inhibitor of NADPH oxidase, 1  $\mu$ M) or NAC (a ROS scavenger, 10 mM) for 1 h, SN50 (a selective inhibitor of NF- $\kappa$ B, 20  $\mu$ M) or Gap27 (Cx32 peptide, 100  $\mu$ M) for 24 h, PFT- $\alpha$  (a selective inhibitor of p53, 10  $\mu$ M) or Cx32-siRNA (50 nM) or vehicle (same volume of DMSO) for 48 h. (A, B) Effects of several reagents on HK-2 and NRK-52E cell growth, relative LDH release. (C) ‘Parachute’ dye-coupling assay was used to determine effects of 2-APB, Gap27, and Cx32-siRNA on decreasing GJ function (scale bar 50  $\mu$ m). Function of GJ is demonstrated by the spread of GJ-permeable calcein-AM (white arrow), and in contrast CM-Dil is impermeable (red arrow). (D, E) Effects of 2APB, Gap27, and Cx32-siRNA on HK-2 cell growth and relative LDH release. (F, G) NRK52E cell apoptotic rates were detected by flow cytometry as described in the Methods and Materials section. Data are presented as mean  $\pm$  SE ( $n=4$ ). \* $p < 0.05$  compared with control group; # $p < 0.05$  versus H24R4 group.  $\phi p < 0.05$  compared with Cx32-NC+H24R4 group in (B–E). 2-APB, 2-aminoethoxydiphenyl borate; DPI, diphenyleneiodonium chloride; NAC, N-acetyl cysteine; NRK52E, rat kidney tubular epithelial cell; PFT- $\alpha$ , pifithrin- $\alpha$ .
