# Supplementary material
Source: PubMed Central journal article supplement (PMC7364332)
Supplement: Supp_Fig7.pdf [file Supp_Fig7.pdf]

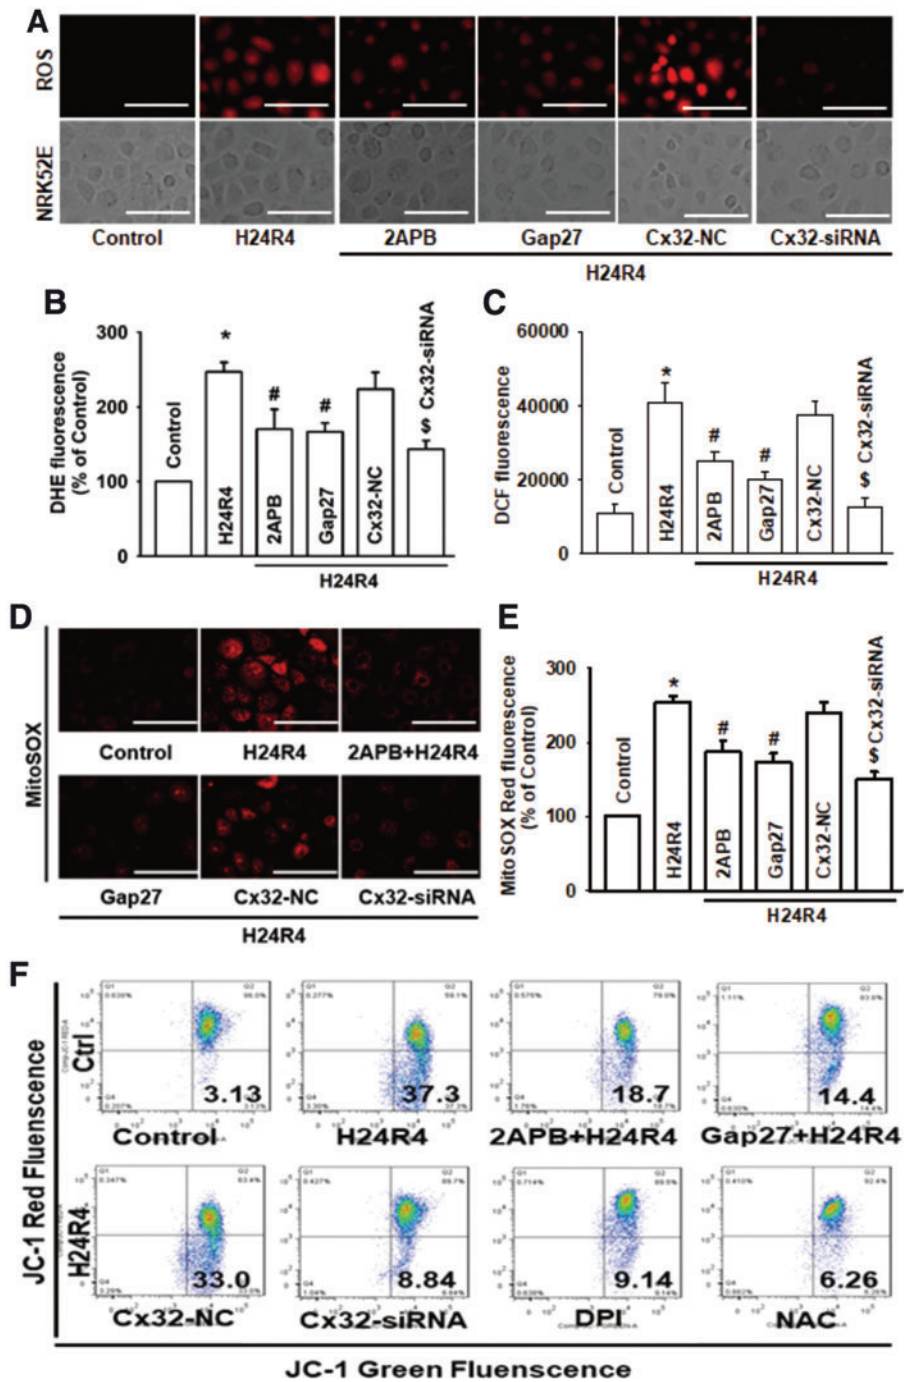

**SUPPLEMENTARY FIG. S7. Cx32 inhibition decreases H24R4-induced ROS generation and apoptotic injury.** Before H24R4 exposure, different methods were used to inhibit GJ function composed of Cx32, including 2APB (gap junction inhibitor, 25  $\mu$ M, 1 h pretreatment), Gap27 (Cx32 peptide, 100  $\mu$ M, 24 h pretreatment), and specific Cx32-siRNA, to observe effects of Cx32 GJ function on NRK52E cellular ROS production. (A–C) Effects of 2APB, Gap27, and Cx32-siRNA on cellular ROS production, detected with DHE staining (A, B, stained in red, scale bar 50  $\mu$ m) and DCFH-DA staining (C). (D, E) Effects of 2APB, Gap27, and Cx32-siRNA on mitochondrial superoxide formation, detected by MitoSOX Red dye staining. (F). Effects of 2APB, Gap27, Cx32-siRNA, DPI, and NAC on mitochondrial membrane potential. Data are presented as mean  $\pm$  SE ( $n=4$ ). \* $p<0.05$  compared with control group; # $p<0.05$  versus H24R4 group. <sup>s</sup> $p<0.05$  compared with Cx32-NC+H24R4 group.
