# Supplementary material
Source: PubMed Central journal article supplement (PMC7364332)
Supplement: Supp_Fig9.pdf [file Supp_Fig9.pdf]

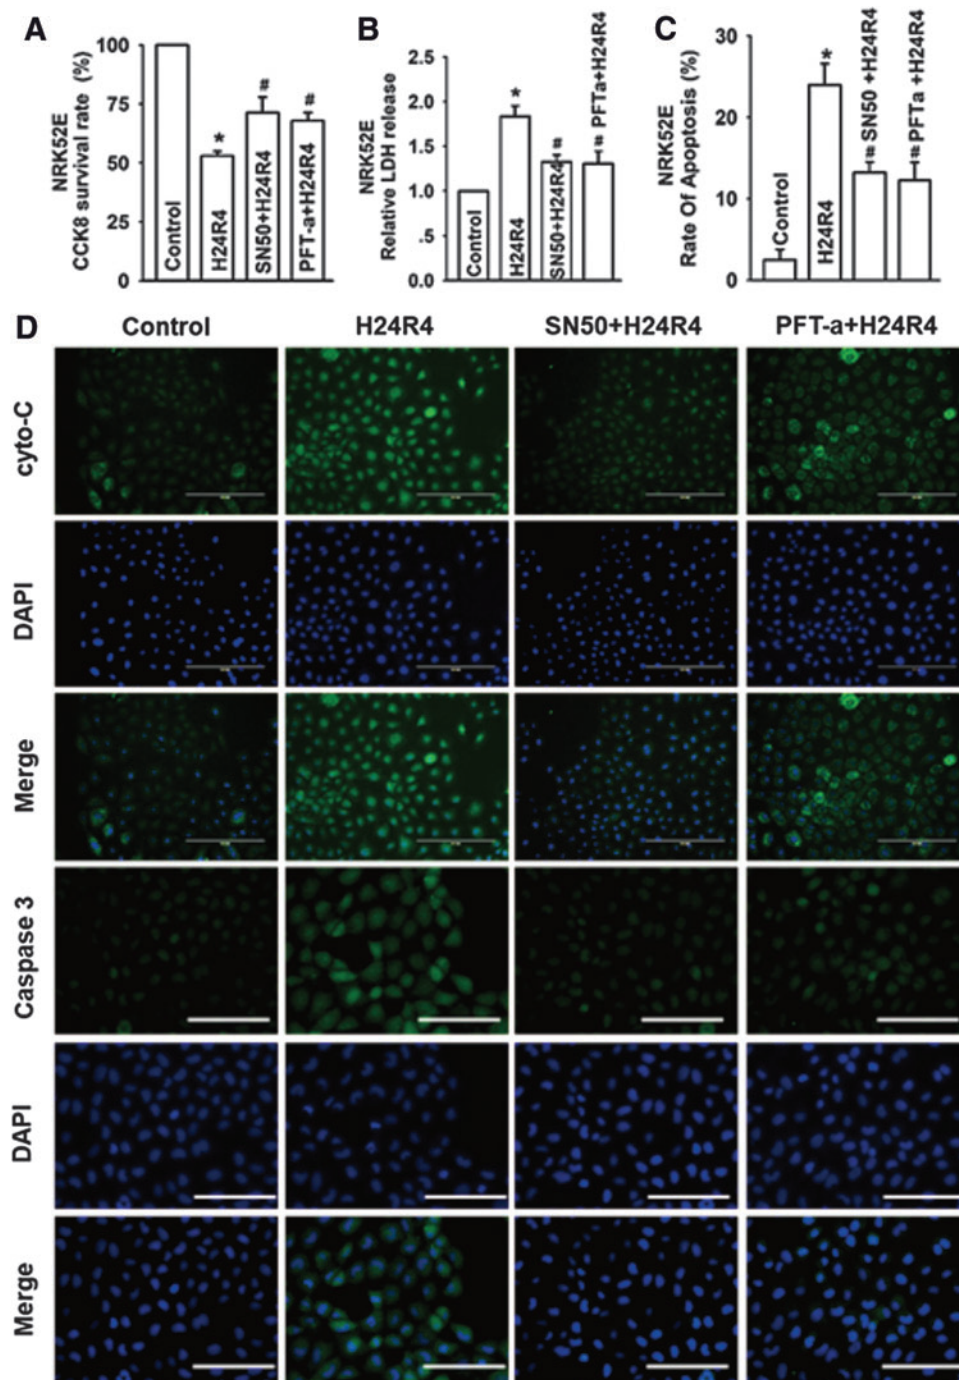

**SUPPLEMENTARY FIG. S9. Inhibition of NF- $\kappa$ B or p53 depresses H24R4-induced NRK52E cell damage.** NRK52E cells were incubated with SN50 (a selective inhibitor of NF- $\kappa$ B, 20  $\mu$ M) for 24 h or PFT- $\alpha$  (a selective inhibitor of p53, 10  $\mu$ M) for 48 h before subjected to H24R4 treatment. (A–C) Effects of SN50 on cell growth, LDH release, and apoptotic rates. (D) Expression of cytochrome-C and caspase-3 was detected by immunofluorescence after H24R4 in NRK52E cells (Cytochrome C, scale bar 100  $\mu$ m; Caspase 3, scale bar 50  $\mu$ m). Data are presented as mean  $\pm$  SE ( $n=4$ ). \* $p < 0.05$  compared with control group; <sup>#</sup> $p < 0.05$  versus H24R4 group.
