# Supplementary material
Source: PubMed Central journal article supplement (PMC7364332)
Supplement: Supp_Fig10.pdf [file Supp_Fig10.pdf]

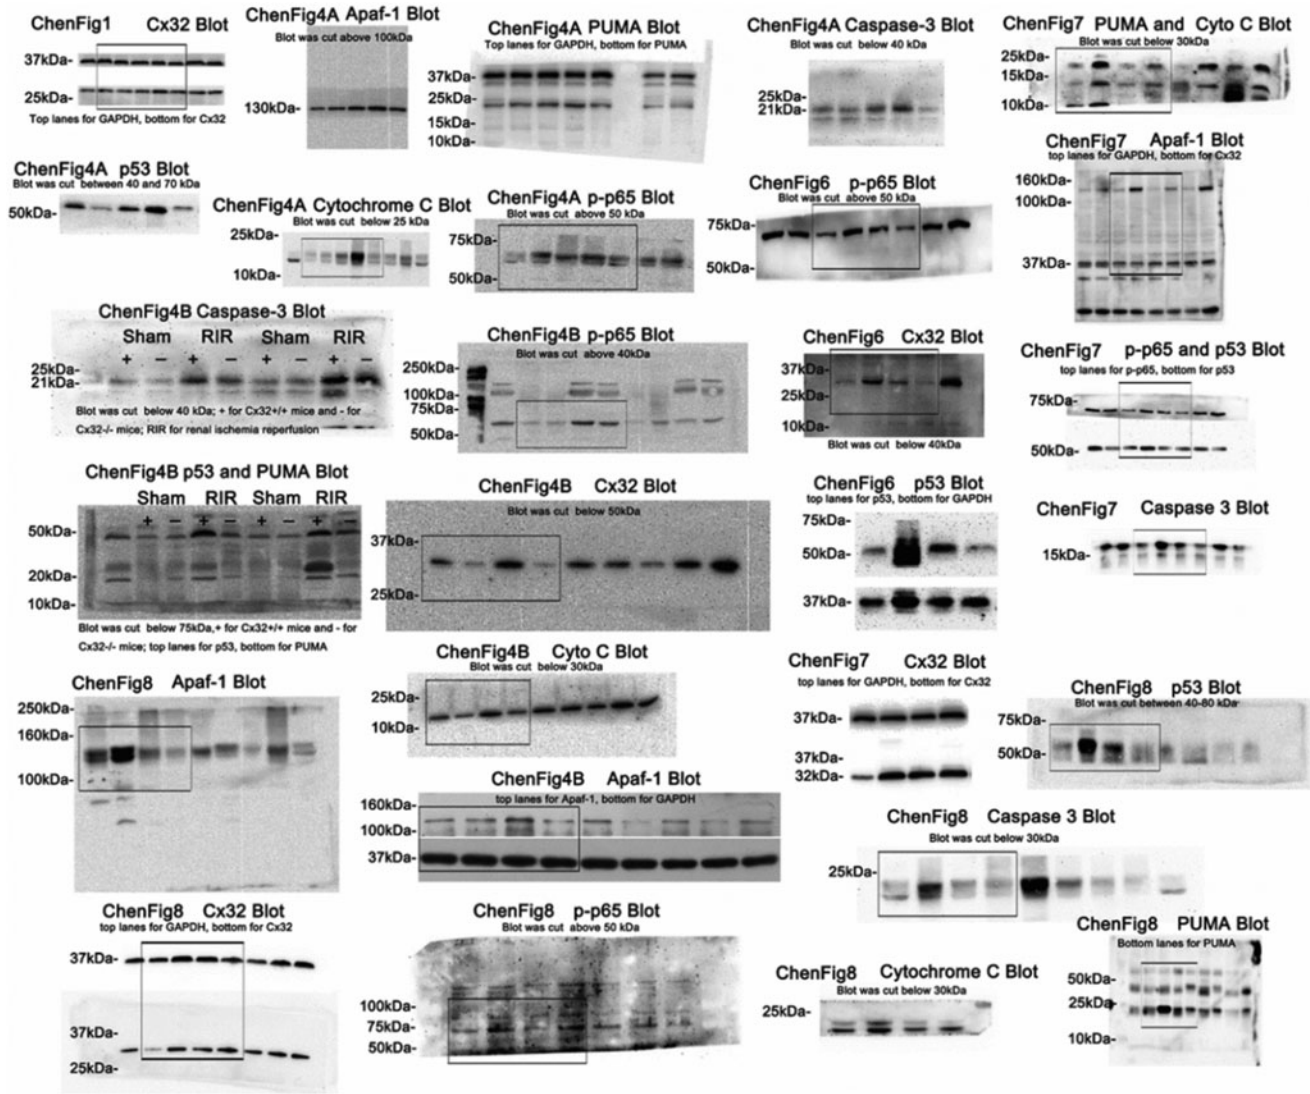

**SUPPLEMENTARY FIG. S10. Entire blot lanes including molecular weight markers for all cropped Western blot bands shown in the main body of the manuscript. The lanes in the rectangle are the exact ones in the main figure. Apaf-1, apoptotic protease activating factor-1; cyto-C, cytochrome C; p-p65, phosphorylated p65 nuclear factor- $\kappa$ B; PUMA, p53 upregulated modulator of apoptosis.**
