# Supplementary material
Source: PubMed Central journal article supplement (PMC7364332)
Supplement: Supp_Table1.pdf [file Supp_Table1.pdf]

SUPPLEMENTARY TABLE S1. MICE BODY WEIGHTS  
AMONG DIFFERENT GROUPS

| <i>Group</i> | <i>Weight (g)</i> |
|--------------|-------------------|
| S            | 23.1 ± 2.8        |
| 6 h          | 23.6 ± 3.8        |
| 12 h         | 22.8 ± 2.3        |
| 24 h         | 23.5 ± 2.7        |
| 48 h         | 23.9 ± 3.0        |

Data are represented as mean ± standard deviation,  $n=8$  for each group. Male C57BL/6 mice that underwent renal IR were sacrificed at the time point of 6, 12, 24, and 48 h after reperfusion. IR, ischemia reperfusion.
